# Supplementary material
Source: publisher figshare collection journal article supplement (https://gsapubs.figshare.com/ndownloader/files/22741976)
Supplement: Supplementary file 1 [file 22741976]

## APPENDIX 1

The following version of table 1 is expanded to include citations and references.

TABLE 1. KNOWN AND PROBABLE IAPETAN NORMAL FAULTS

| Locality*                                                                                                                                                                                                                                                                                                                                | Strike | Side<br>down | Age*        |
|------------------------------------------------------------------------------------------------------------------------------------------------------------------------------------------------------------------------------------------------------------------------------------------------------------------------------------------|--------|--------------|-------------|
| 1. Southeastern Labrador <sup>s</sup><br>Geologic mapping, geochronology (Gower and others, 1986)                                                                                                                                                                                                                                        | NE     | SE           | <u>P</u> -C |
| 2. Lower St. Lawrence seismic zone<br>Focal mechanisms, diffuse alignments of earthquake epicenters, analogy to Charlevoix, Quebec (Adams and others, 1988, 1989; Adams and Basham, 1991)                                                                                                                                                | NE     | ..           | ..          |
| 3. Charlevoix, Quebec<br>Tabular zones of precisely located earthquake foci (Anglin, 1984), focal mechanisms (Hasegawa and Wetmiller, 1980; Adams and others, 1988; Wetmiller and Adams, 1990; Bent, 1992), analogy to nearby faults (Adams and Basham, 1991), geologic mapping (Rondot, 1972, 1979)                                     | NE     | SE           | C           |
| 4. Southeastern Quebec<br>Well logs, seismic reflection profiles, geologic mapping (Houde and Clark, 1961; 9 smaller-scale maps in Quebec Department of Natural Resources Geological Reports; St. Julien and others, 1983)                                                                                                               | E,NE   | S,SE         | C-MO        |
| 5. Southeastern Ontario<br>Geologic mapping (Ontario Geological Survey, 1991)                                                                                                                                                                                                                                                            | NE     | SE,NW        | C-EO        |
| 6. McGregor fault, eastern Adirondacks, N.Y.<br>Geologic mapping and microstructural analysis (Isachsen and McKendree, 1977; Willems and others, 1983)                                                                                                                                                                                   | N      | E            | <u>P</u>    |
| 7. Clarendon-Linden fault zone, N.Y.<br>Well logs, seismic reflection profiles (Van Tyne, 1975; Pomeroy and others, undated; A.M. Van Tyne, oral commun., 1989), focal mechanisms (Herrmann, 1978), earthquakes induced on or near mapped faults by fluid injection (Fletcher and Sykes, 1977), location on trend from Olin basin in Pa. | N      | E            | C-MO        |
| 8. Northwestern side of Olin basin, Pa.<br>Well logs show stacked changes in facies and thicknesses (Wagner, 1976; Berg, 1980), seismic reflection profile (Beardsley and Cable, 1983)                                                                                                                                                   | NE     | SE           | C           |



## REFERENCES CITED

- Adams, J., and Basham, P., 1991, The seismicity and seismotectonics of eastern Canada, *in* Slemmons, D.B., Engdahl, E.R., Zoback, M.D., and Blackwell, D.D., eds., *Neotectonics of North America: Boulder, Colorado, Geological Society of America, Decade Map Volume 1*, p. 261-276.
- Adams, J., Sharp, J., and Stagg, M.C., 1988, New focal mechanisms for southeastern Canadian earthquakes: Geological Survey of Canada Open File 1892, 108 p.
- Adams, J., Sharp, J., and Connors, K., 1989, Revised epicenters for earthquakes in the lower St. Lawrence seismic zone, 1928-1968: Geological Survey of Canada Open File 2072, 82 p.
- Anglin, F.M., 1984, Seismicity and faulting in the Charlevoix zone of the St. Lawrence Valley: *Bulletin of the Seismological Society of America*, v. 74, p. 595-603.
- Beardsley, R.W., and Cable, M.S., 1983, Overview of the evolution of the Appalachian basin: *Northeastern Geology*, v. 5, no. 3/4, p. 137-145.
- Bent, A.L., 1992, A re-examination of the 1925 Charlevoix, Québec earthquake: *Seismological Society of America Bulletin*, v. 82, p. 2097-2113.
- Berg, T.M., chief compiler, 1980, *Geologic map of Pennsylvania: Pennsylvania Topographic and Geologic Survey Map 1*, 3 sheets, scale 1:250,000.
- Bollinger, G.A., 1987, Seismotectonics of the Virginia and eastern Tennessee seismic zones, *in* Jacob, K.H., ed., *Proceedings from the symposium on seismic hazards, ground motions, soil-liquefaction and engineering practice in eastern North America: National Center for Earthquake Engineering Research Technical Report NCEER-87-0025*, p. 202-216.
- Bollinger, G.A., and Wheeler, R.L., 1983, The Giles County, Virginia, seismic zone: *Science*, v. 219, p. 1063-1065.
- 1988, The Giles County, Virginia, seismogenic zone--Seismological results and geological interpretations: *U.S. Geological Survey Professional Paper 1355*, 85 p.
- Bradley, D.C., and Kidd, W.S.F., 1991, Flexural extension of the upper continental crust in collisional foredeeps: *Geological Society of America Bulletin*, v. 103, p. 1416-1438.
- Cable, M.S., and Beardsley, R.W., 1983, Structural controls on Late Cambrian and Early Ordovician carbonate sedimentation in eastern Kentucky: *American Journal of Science*, v. 284, p. 797-823.
- Davison, F.C., Jr., 1988, Stress tensor estimates derived from focal mechanism solutions of sparse data sets--Applications to seismic zones in Virginia and eastern Tennessee: *Virginia Polytechnic Institute and State University, Ph.D. dissertation*, 189 p.
- Favret, P.D., and Williams, R.T., 1988, Basement beneath the Blue Ridge and Inner Piedmont in northeastern Georgia and the Carolinas: A preserved, Late Proterozoic, rifted continental margin: *Geological Society of America Bulletin*, v. 100, p. 1999-2007.



- Fletcher, J.B., and Sykes, L.R., 1977, Earthquakes related to hydraulic mining and natural seismic activity in western New York State: *Journal of Geophysical Research*, v. 82, p. 3767-3780.
- Gower, C.F., Erdmer, P., and Wardle, R.J., 1986, The Double Mer Formation and the Lake Melville rift system, eastern Labrador: *Canadian Journal of Earth Sciences*, v. 23, p. 359-368.
- Gresko, M.J., 1985, Analysis and interpretation of compressional (P-wave) and shear (SH-wave) reflection seismic and geologic data over the Bane dome, Giles County, Virginia: Virginia Polytechnic Institute and State University, Ph.D. dissertation, 74 p.
- Gresko, M.J., Munsey, J.W., and Bollinger, G.A. , 1985, Structure of the Giles County, VA seismogenic zone interpreted from seismic reflection data [abs.]: *Eos, Transactions of the American Geophysical Union*, v. 66, no. 46, p. 974.
- Harris, L.D., 1975, Oil and gas data from the Lower Ordovician and Cambrian rocks in the Appalachian basin: U.S. Geological Survey Miscellaneous Investigations Map I-917-D, 3 sheets.
- , 1978, The Eastern Interior aulacogen and its relation to Devonian shale-gas production, *in* Anonymous, ed., Eastern Gas Shales Symposium, 2d, Preprints: Morgantown, West Virginia, U.S. Department of Energy METC/SP-78/6, v. II, p. 55-72.
- Hasegawa, H.S., and Wetmiller, R.J., 1980, The Charlevoix earthquake of 19 August 1979 and its seismo-tectonic environment: *Earthquake Notes*, v. 51, no. 4, p. 23-37.
- Herrmann, R.B., 1978, A seismological study of two Attica, New York earthquakes: *Journal of Geophysical Research*, p. 68, p. 641-651.
- Houde, M., and Clark, T.H., 1961, Geological map of St. Lawrence lowlands: Quebec Department of Natural Resources Map No. 1407, 1 sheet, scale 1:253,440.
- Hubbard, S.S., Coruh, C., and Costain, J.K., 1991, Paleozoic and Grenvillian structures in the southern Appalachians: Extended interpretation of seismic reflection data: *Tectonics*, v. 10, p. 141-170.
- Isachsen, Y.W., and McKendree, W.G., 1977, Preliminary brittle structures map of New York--Adirondack sheet: New York State Museum Map and Chart Series No. 31A, 1 sheet, scale 1:250,000.
- Jacobeen, F., Jr., and Kanes, W.H., 1975, Structure of the Broadtop synclinorium, Wills Mountain anticlinorium, and Allegheny frontal zone: *American Association of Petroleum Geologists Bulletin*, v. 59, p. 1136-1150.
- Johnston, A.C., Reinbold, D.J., and Brewer, S.I., 1985, Seismotectonics of the southern Appalachians: *Seismological Society of America Bulletin*, v. 75, p. 291-312.
- Kulander, B.R., and Dean, S.L., 1978, Gravity, magnetics, and structure of the Allegheny Plateau/western Valley and Ridge in West Virginia and adjacent states: West Virginia Geological and Economic Survey Report of Investigation RI-27, 91 p., 3 folded plates.

- Munsey, J.W., and Bollinger, G.A., 1985, Focal mechanism analyses for Virginia earthquakes (1978-1984): *Seismological Society of America Bulletin*, v. 75, p. 1613-1636.
- Ontario Geological Survey, 1991, Bedrock geology of Ontario, southern sheet: Ontario Geological Survey Map 2544, 1 sheet, scale 1:1,000,000.
- Pomeroy, P.W., Nowak, T.A., Jr., and Fakundiny, R.H., undated, Clarendon-Linden fault system of western New York--A Vibroseis study: New York State Geological Survey Open-File Report, 66 p.
- Powell, C.A., Bollinger, G.A., Chapman, M.C., Sibol, M.S., Johnston, A.C., and Wheeler, R.L., 1994, A seismotectonic model for the 300-kilometer-long eastern Tennessee seismic zone: *Science*, v. 264, p. 686-688.
- Roksandic, M.M., and Granger, Bernard, 1981, Structural styles of Anticosti Island, Gaspé Passage, and eastern Gaspé Peninsula inferred from reflection seismic data, *in* Lespérance, P.J., ed., International Union of Geological Sciences field meeting, Anticosti-Gaspé, Québec, v. 2: Montreal, Canada, University of Montreal, p. 211-221.
- Rondot, J., 1972, La Transgression Ordovicienne dans le Comté de Charlevoix, Québec: *Canadian Journal of Earth Sciences*, v. 9, p. 1187-1203.
- 1979, Reconnaissances géologiques dans Charlevoix-Saguenay: Ministère des Richesses Naturelles du Québec: DPV-682, 44 p., 2 folded maps, scale 1:250,000.
- Ryder, R.T., 1992, Stratigraphic framework of Cambrian and Ordovician rocks in the central Appalachian basin from Morrow County, Ohio, to Pendleton County, West Virginia: *U.S. Geological Survey Bulletin* 1839-G, 28 p., 1 folded plate.
- St.-Julien, P., Slivitsky, A., and Feininger, T., 1983, A deep structural profile across the Appalachians of southern Quebec, *in* Hatcher, R.D., Jr., Williams, H., and Zietz, I., eds., Contributions to the tectonics and geophysics of mountain chains: *Geological Society of America Memoir* 158, p. 103-111, 4 folded figures.
- Teague, A.G., Bollinger, G.A., and Johnston, A.C., 1986, Focal mechanism analyses for eastern Tennessee earthquakes (1981-1983): *Seismological Society of America Bulletin*, v. 76, p. 95-109.
- Tegland, E.R., 1978, Seismic investigations in eastern Tennessee: *Tennessee Division of Geology Bulletin* 78, 68 p., 3 plates.
- Thomas, W.A., 1986, A Paleozoic synsedimentary structure in the Appalachian fold-thrust belt in Alabama, *in* McDowell, R.C., and Glover, L., III, eds., The Lowry volume: Studies in Appalachian geology: Virginia Tech Department of Geological Sciences Memoir 3, p. 1-12.
- 1991, The Appalachian-Ouachita rifted margin of southeastern North America: *Geological Society of America Bulletin*, v. 103, p. 415-431.
- Van Tyne, A.M., 1975, Subsurface investigation of the Clarendon-Linden structure, western New York: New York State Geological Survey Open-File Report, 14 p., 6 folded plates.

- Wagner, W.R., 1976, Growth faults in Cambrian and lower Ordovician rocks of western Pennsylvania: American Association of Petroleum Geologists Bulletin, v. 60, p. 414-427.
- Wetmiller, R.J., and Adams, J., 1990, An earthquake doublet in the Charlevoix seismic zone, Québec: Geological Survey of Canada Paper 90-1, p. 105-113.
- Willems, H.X., Bosworth, W., and Putnam, G.W., 1983, Evidence for complex strain history of the McGregor fault, eastern Adirondacks: A possible reactivated late Pre-Cambrian rift structure: Geological Society of America Abstracts with Programs, v. 15, no. 3, p. 124.
